# Supplementary material
Source: HighWire-hosted journal article supplement (https://jnm.snmjournals.org/highwire/filestream/94129/field_highwire_adjunct_files/0/jnm070920_Supplemental_Figure.pdf)
Supplement: jnm070920_Supplemental_Figure.pdf [file jnm070920_Supplemental_Figure.pdf]

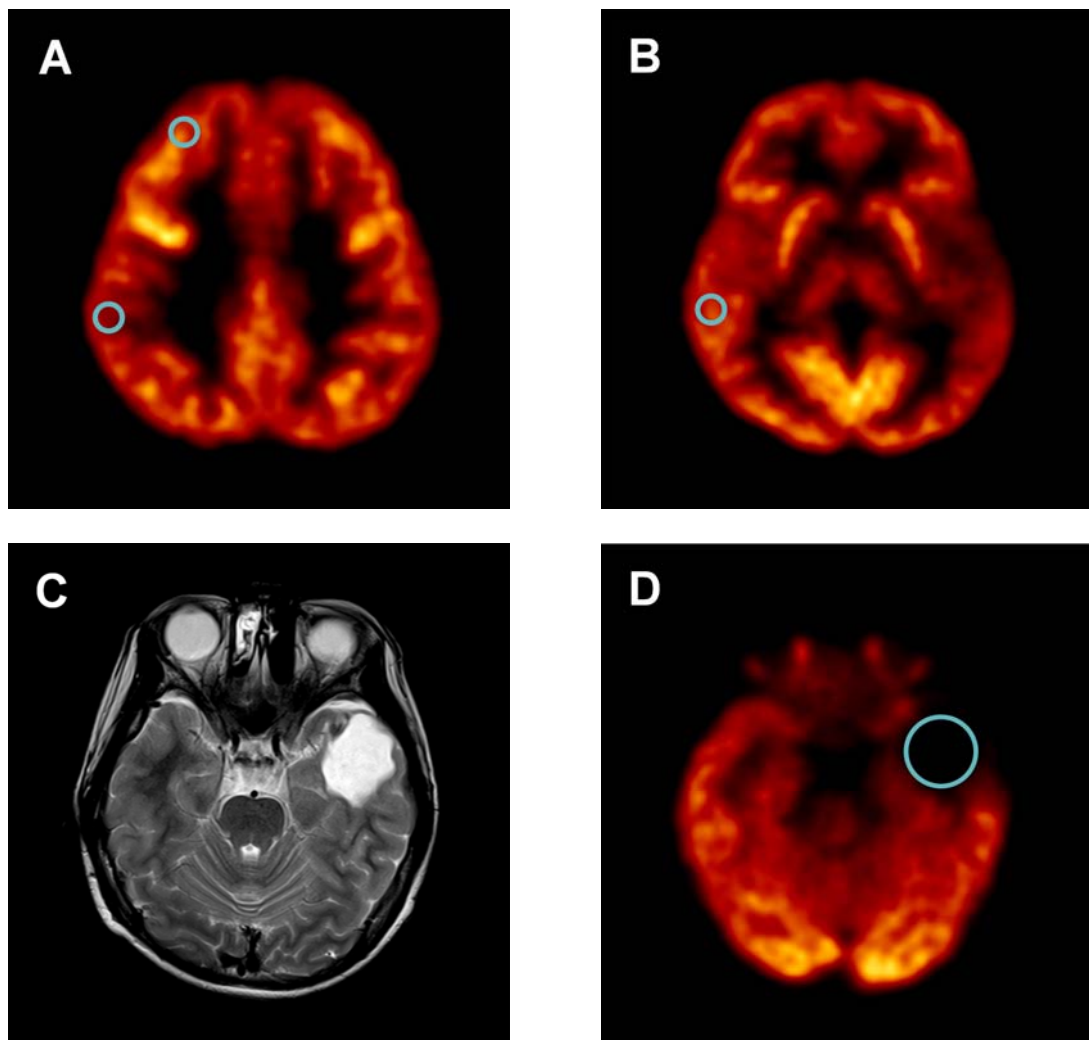

SUPPLEMENTAL FIGURE 1.

To measure contralateral gray matter, frontal and parietal circular ROIs were drawn at the level of the top of the cingulate gyrus and a temporal ROI was drawn at the level of mid-basal ganglia in each patient (A, B). An ROI for the lesion was drawn to include the territory of the whole lesion (C, D).
